# Supplementary material
Source: Springer Nature journal article supplement (https://www.springermedizin.de/resource/supplementary/12984_2006_114_MOESM7_ESM.pdf/9605336)
Supplement: MOESM7 [file 9605336]

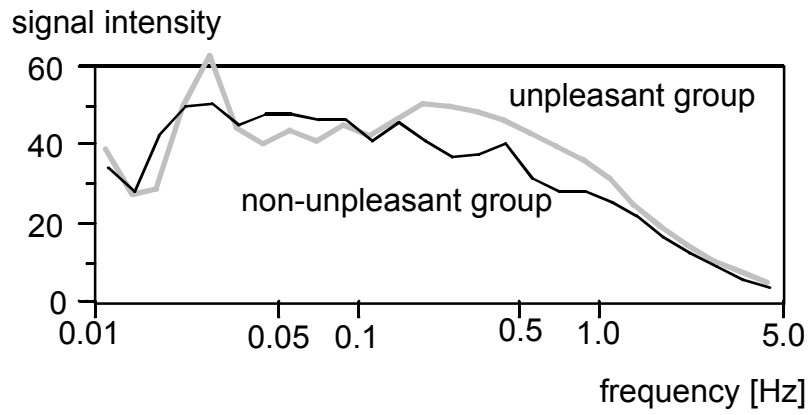

Fig. 7. Averaged spectrum pattern of eye movement around the trigger point (80-90 s) for the unpleasant and non-unpleasant groups.
